# Supplementary material for: Radiation-induced effects on the extraction properties of hexa-n-octylnitrilo-triacetamide (HONTA) complexes of americium and europium
Source: Royal Society of Chemistry journal article supplement (doi:10.1039/d0cp05720g), 2020-12-09
Supplement: d0cp05720g1.pdf [file d0cp05720g1.pdf]

## Supplementary Information for Radiation-Induced Effects on the Extraction Properties of Hexa-*n*-octylnitrilo-triacetamide (HONTA) Complexes of Americium and Europium

Tomohiro Toigawa,<sup>a\*</sup> Dean R. Peterman,<sup>b</sup> David S. Meeker,<sup>b</sup> Travis S. Grimes,<sup>b</sup> Peter R. Zalupski,<sup>b</sup> Stephen P. Mezyk,<sup>c</sup> Andrew R. Cook,<sup>d</sup> Shinichi Yamashita,<sup>e</sup> Yuta Kumagai,<sup>a</sup> Tatsuro Matsumura,<sup>a</sup> and Gregory P. Horne<sup>b\*</sup>

- Japan Atomic Energy Agency, Nuclear Science and Engineering Center, 2-4 Shirakata, Tokai-mura, Naka-gun, Ibaraki 319-1195, Japan.
- Idaho National Laboratory, Center for Radiation Chemistry Research, Idaho Falls, ID, P.O. Box 1625, 83415, USA.
- California State University Long Beach, Department of Chemistry and Biochemistry, Long Beach, CA 90804, USA.
- Brookhaven National Laboratory, Department of Chemistry, Upton, NY, 11973, USA.
- University of Tokyo, Nuclear Professional School, School of Engineering, 2-22 Shirakata, Tokai-mura, Naka-gun, Ibaraki 319-1188, Japan.

\* E-mails: [toigawa.tomohiro@jaea.go.jp](mailto:toigawa.tomohiro@jaea.go.jp) and [gregory.horne@inl.gov](mailto:gregory.horne@inl.gov)

### HONTA Degradation Product HPLC-ESI-MS/MS Spectra

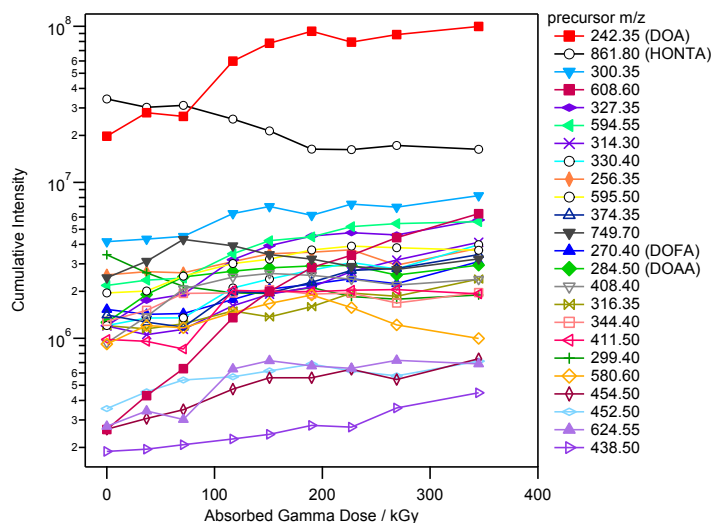

**Fig. S1.** HPLC-ESI-MS/MS signal amplitude for HONTA and 23 detectable degradation products from the gamma radiolysis of 100 mM HONTA in *n*-dodecane contacted with a 0.1 M HNO<sub>3</sub> aqueous phase as a function of precursor *m/z* and absorbed gamma dose ( $\sim 2.03$  kGy h<sup>-1</sup>).

## Supplementary Information

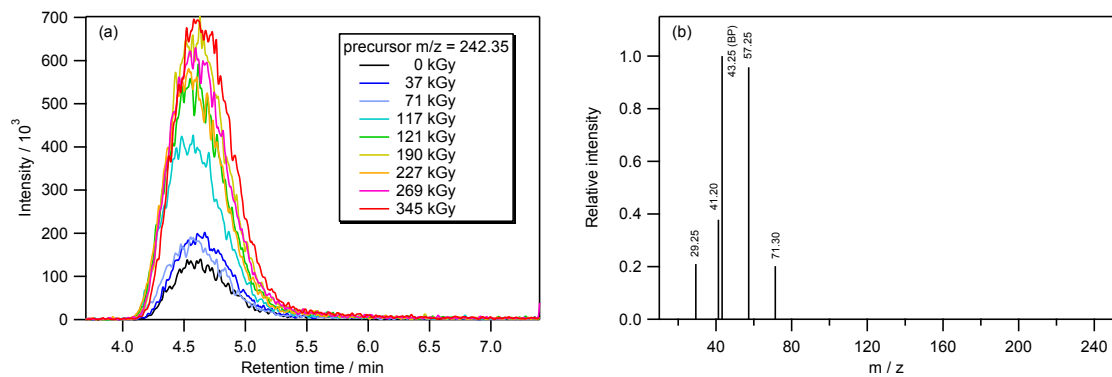

**Fig. S2. (a)** HPLC-ESI-MS/MS total ion chromatogram for precursor  $m/z = 242.35$  from the gamma radiolysis of formally 100 mM HONTA in *n*-dodecane contacted with a 0.1 M  $\text{HNO}_3$  aqueous phase as a function of retention time and absorbed gamma dose ( $\sim 2.03 \text{ kGy h}^{-1}$ ). **(b)** MS/MS spectrum obtained with 35 eV collision energy. This product was assigned to dioctylamine (DOA, MW = 241.4) from the retention time and the MS/MS spectrum by using standard solutions.

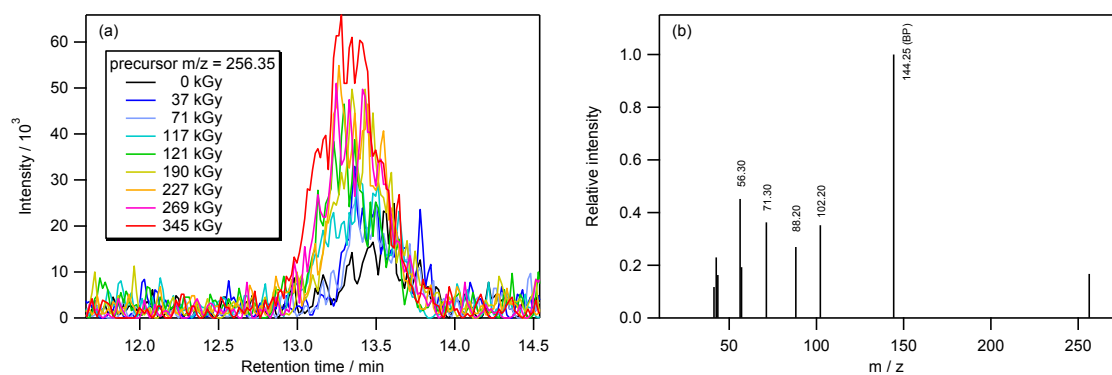

**Fig. S3. (a)** HPLC-ESI-MS/MS total ion chromatogram for precursor  $m/z = 256.35$  from the gamma radiolysis of 100 mM HONTA in *n*-dodecane contacted with a 0.1 M  $\text{HNO}_3$  aqueous phase as a function of retention time and absorbed gamma dose ( $\sim 2.03 \text{ kGy h}^{-1}$ ). **(b)** MS/MS spectrum obtained with 30 eV collision energy.

## Supplementary Information

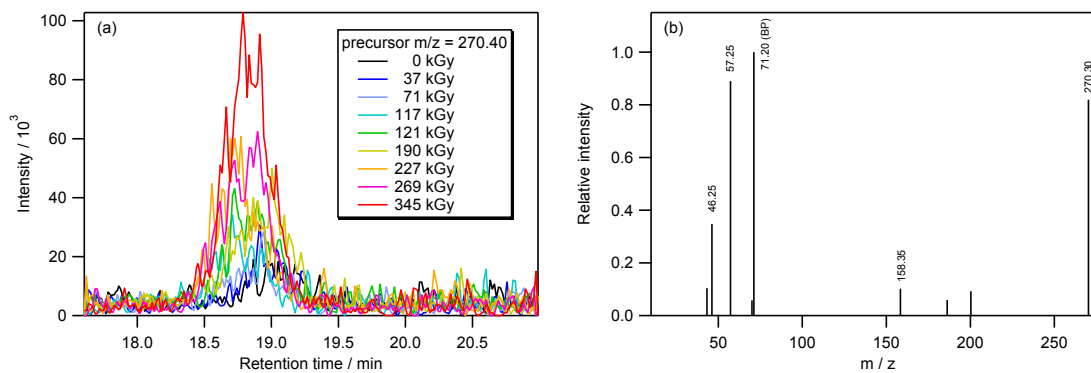

**Fig. S4. (a)** HPLC-ESI-MS/MS total ion chromatogram for precursor  $m/z = 270.40$  from the gamma radiolysis of 100 mM HONTA in *n*-dodecane contacted with a 0.1 M HNO<sub>3</sub> aqueous phase as a function of retention time and absorbed gamma dose ( $\sim 2.03 \text{ kGy h}^{-1}$ ). **(b)** MS/MS spectrum obtained with 25 eV collision energy. This product was assigned as dioctylformamide (DOFA, MW = 269.3) from the retention time and the MS/MS spectrum by using standard solutions.

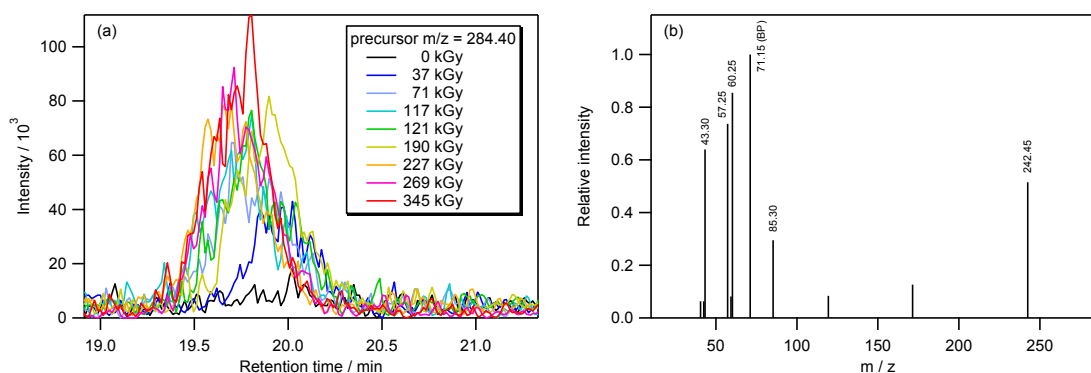

**Fig. S5. (a)** HPLC-ESI-MS/MS total ion chromatogram for precursor  $m/z = 284.40$  from the gamma radiolysis of 100 mM HONTA in *n*-dodecane contacted with a 0.1 M HNO<sub>3</sub> aqueous phase as a function of retention time and absorbed gamma dose ( $\sim 2.03 \text{ kGy h}^{-1}$ ). **(b)** MS/MS spectrum obtained with 30 eV collision energy. This product was assigned as dioctylacetamide (DOAA, MW = 283.5) from the retention time and the MS/MS spectrum by using standard solutions.

Supplementary Information

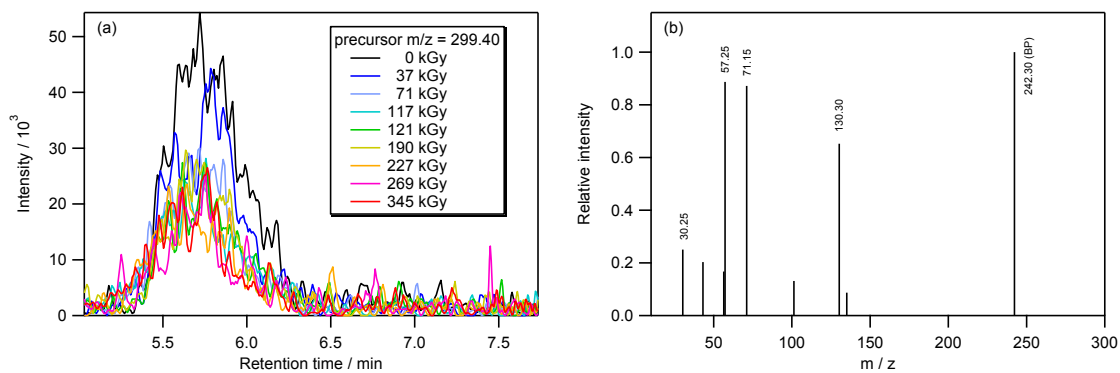

**Fig. S6. (a)** HPLC-ESI-MS/MS total ion chromatogram for precursor  $m/z = 299.40$  from the gamma radiolysis of 100 mM HONTA in *n*-dodecane contacted with a 0.1 M HNO<sub>3</sub> aqueous phase as a function of retention time and absorbed gamma dose ( $\sim 2.03$  kGy h<sup>-1</sup>). **(b)** MS/MS spectrum obtained with 30 eV collision energy.

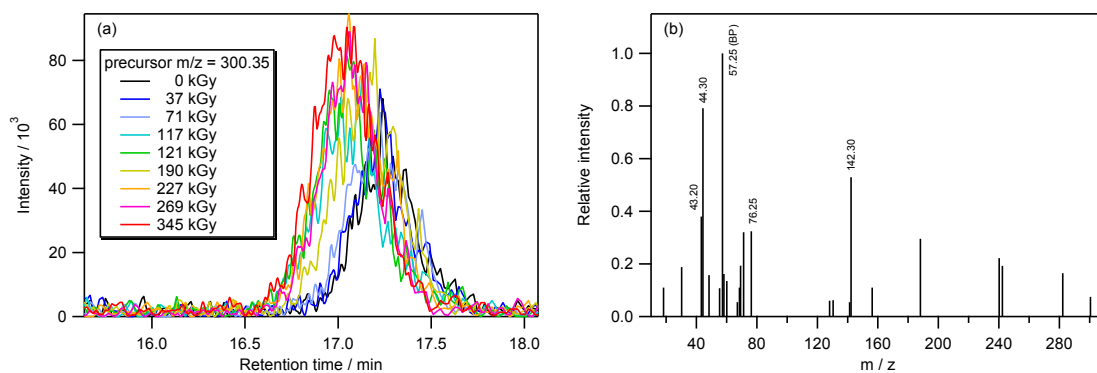

**Fig. S7. (a)** HPLC-ESI-MS/MS total ion chromatogram for precursor  $m/z = 300.35$  from the gamma radiolysis of 100 mM HONTA in *n*-dodecane contacted with a 0.1 M HNO<sub>3</sub> aqueous phase as a function of retention time and absorbed gamma dose ( $\sim 2.03$  kGy h<sup>-1</sup>). **(b)** MS/MS spectrum obtained with 30 eV collision energy.

Supplementary Information

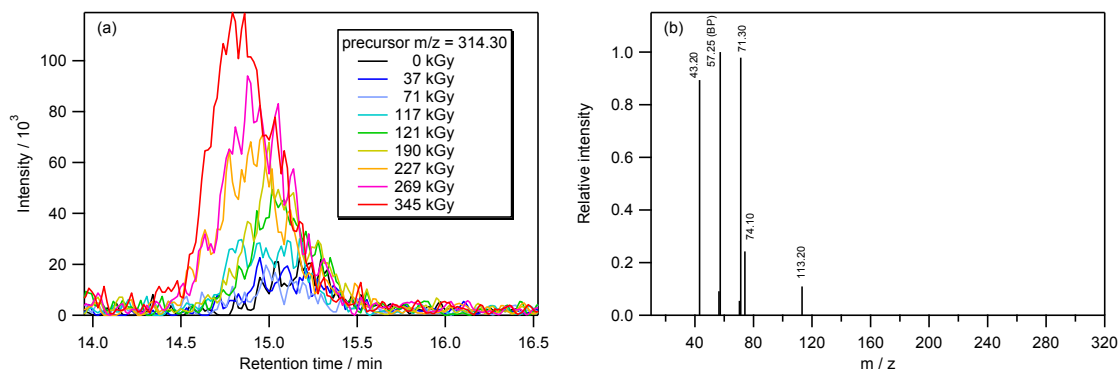

**Fig. S8. (a)** HPLC-ESI-MS/MS total ion chromatogram for precursor  $m/z = 314.30$  from the gamma radiolysis of 100 mM HONTA in *n*-dodecane contacted with a 0.1 M  $\text{HNO}_3$  aqueous phase as a function of retention time and absorbed gamma dose ( $\sim 2.03 \text{ kGy h}^{-1}$ ). **(b)** MS/MS spectrum obtained with 40 eV collision energy.

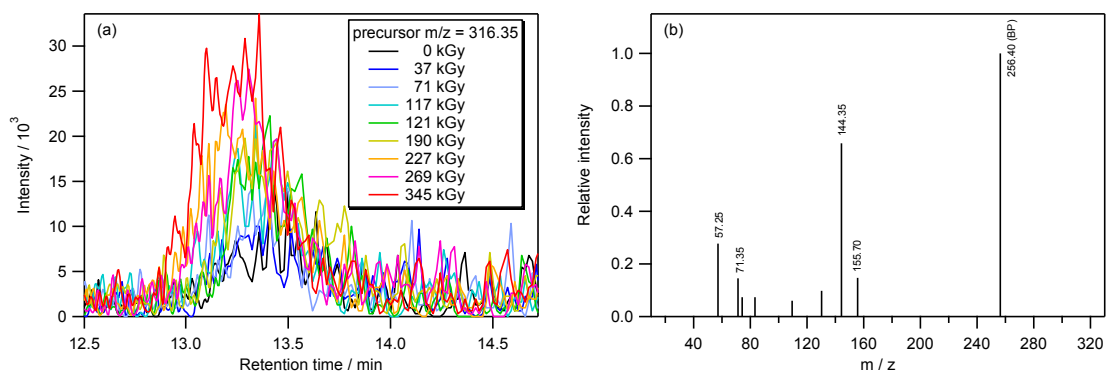

**Fig. S9. (a)** HPLC-ESI-MS/MS total ion chromatogram for precursor  $m/z = 316.35$  from the gamma radiolysis of 100 mM HONTA in *n*-dodecane contacted with a 0.1 M  $\text{HNO}_3$  aqueous phase as a function of retention time and absorbed gamma dose ( $\sim 2.03 \text{ kGy h}^{-1}$ ). **(b)** MS/MS spectrum obtained with 30 eV collision energy.

Supplementary Information

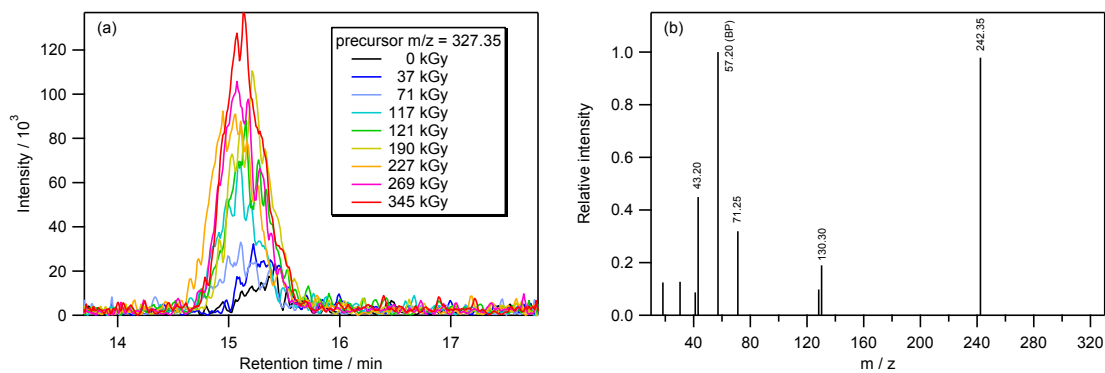

**Fig. S10.** (a) HPLC-ESI-MS/MS total ion chromatogram for precursor  $m/z = 327.35$  from the gamma radiolysis of 100 mM HONTA in *n*-dodecane contacted with a 0.1 M  $\text{HNO}_3$  aqueous phase as a function of retention time and absorbed gamma dose ( $\sim 2.03 \text{ kGy h}^{-1}$ ). (b) MS/MS spectrum obtained with 35 eV collision energy.

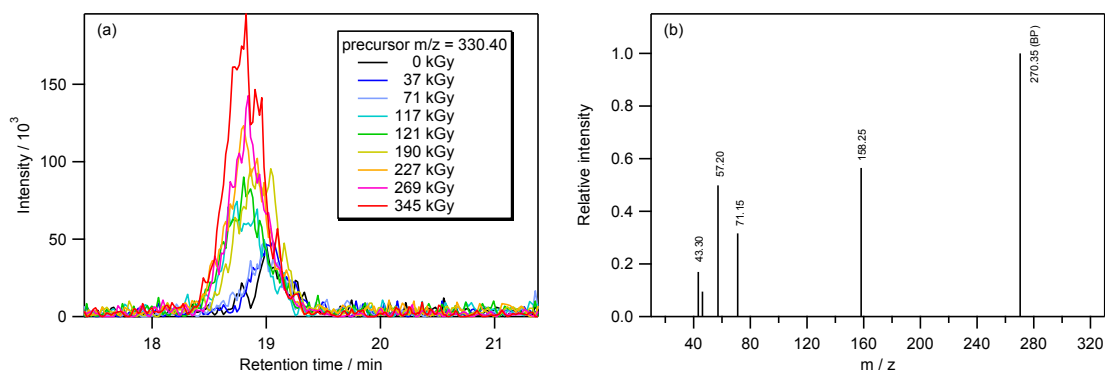

**Fig. S11.** (a) HPLC-ESI-MS/MS total ion chromatogram for precursor  $m/z = 330.40$  from the gamma radiolysis of 100 mM HONTA in *n*-dodecane contacted with a 0.1 M  $\text{HNO}_3$  aqueous phase as a function of retention time and absorbed gamma dose ( $\sim 2.03 \text{ kGy h}^{-1}$ ). (b) MS/MS spectrum obtained with 30 eV collision energy.

Supplementary Information

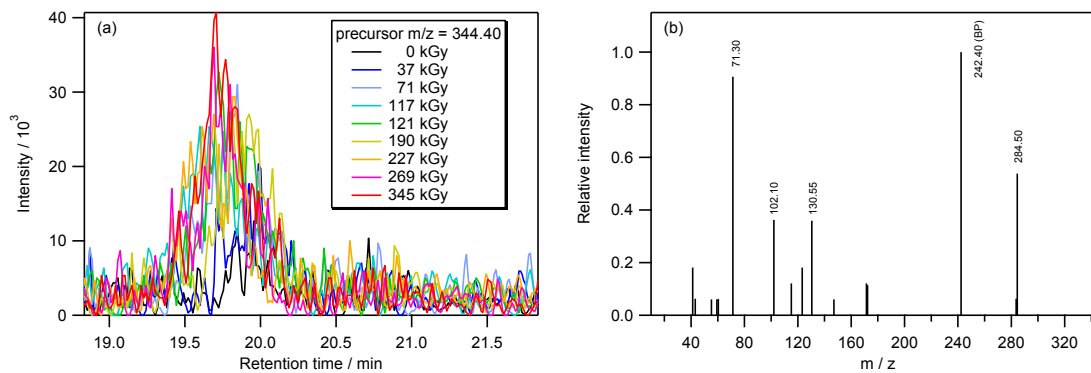

**Fig. S12.** (a) HPLC-ESI-MS/MS total ion chromatogram for precursor  $m/z = 344.40$  from the gamma radiolysis of 100 mM HONTA in *n*-dodecane contacted with a 0.1 M  $\text{HNO}_3$  aqueous phase as a function of retention time and absorbed gamma dose ( $\sim 2.03 \text{ kGy h}^{-1}$ ). (b) MS/MS spectrum obtained with 35 eV collision energy.

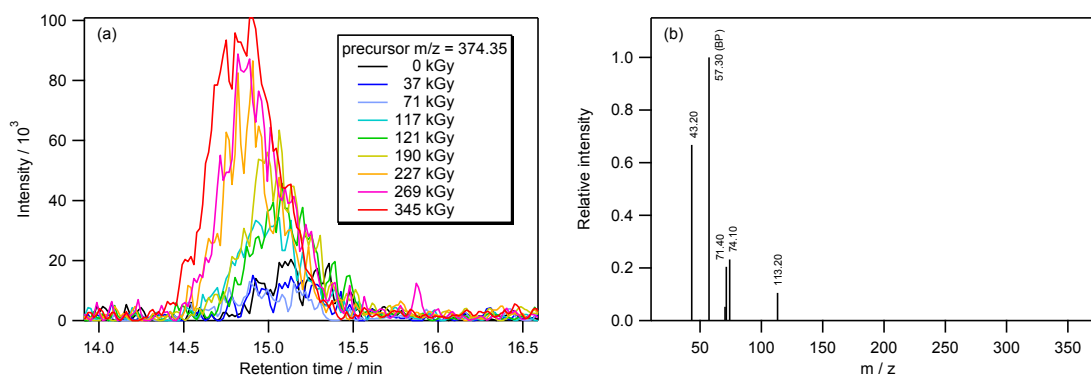

**Fig. S13.** (a) HPLC-ESI-MS/MS total ion chromatogram for precursor  $m/z = 374.35$  from the gamma radiolysis of 100 mM HONTA in *n*-dodecane contacted with a 0.1 M  $\text{HNO}_3$  aqueous phase as a function of retention time and absorbed gamma dose ( $\sim 2.03 \text{ kGy h}^{-1}$ ). (b) MS/MS spectrum obtained with 40 eV collision energy.

Supplementary Information

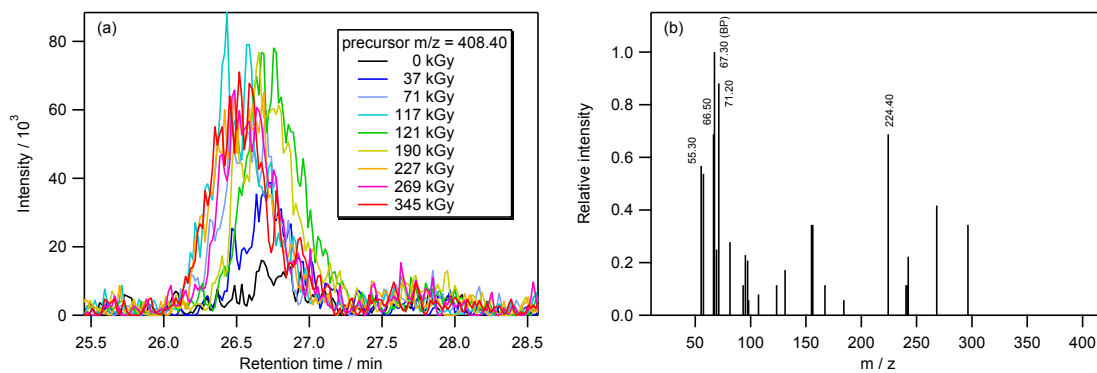

**Fig. S14.** (a) HPLC-ESI-MS/MS total ion chromatogram for precursor  $m/z = 408.40$  from the gamma radiolysis of 100 mM HONTA in *n*-dodecane contacted with a 0.1 M  $\text{HNO}_3$  aqueous phase as a function of retention time and absorbed gamma dose ( $\sim 2.03 \text{ kGy h}^{-1}$ ). (b) MS/MS spectrum obtained with 35 eV collision energy.

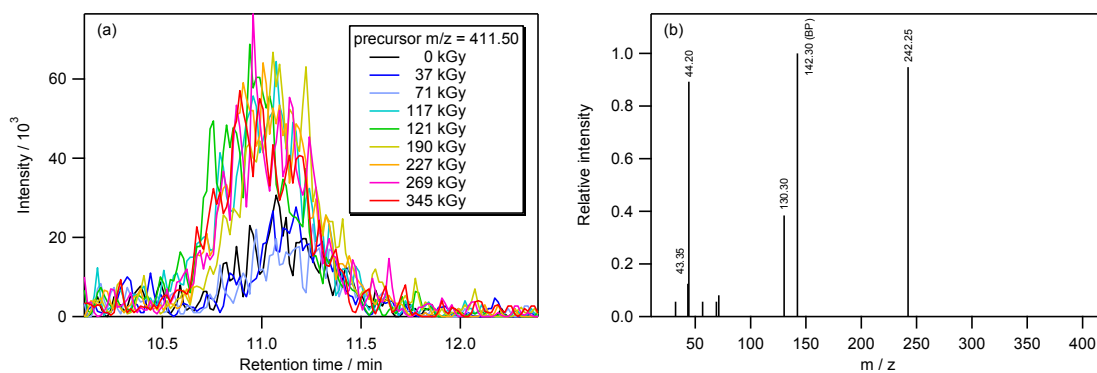

**Fig. S15.** (a) HPLC-ESI-MS/MS total ion chromatogram for precursor  $m/z = 411.50$  from the gamma radiolysis of 100 mM HONTA in *n*-dodecane contacted with a 0.1 M  $\text{HNO}_3$  aqueous phase as a function of retention time and absorbed gamma dose ( $\sim 2.03 \text{ kGy h}^{-1}$ ). (b) MS/MS spectrum obtained with 35 eV collision energy.



Supplementary Information

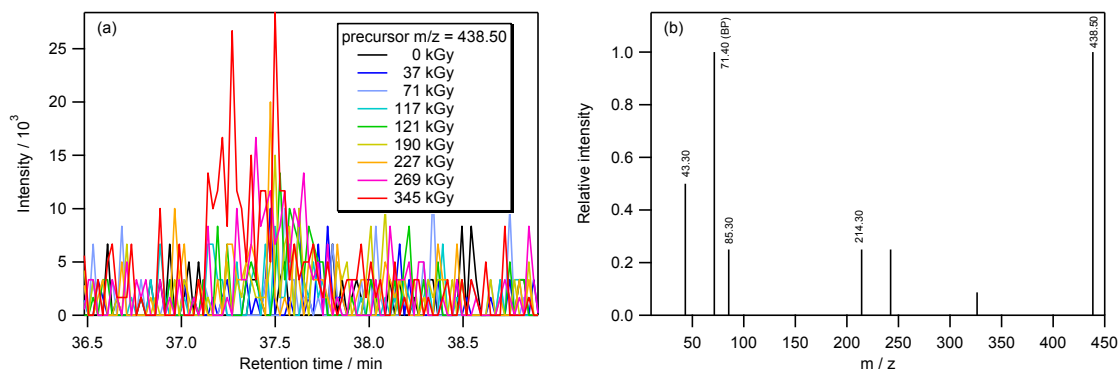

**Fig. S16.** (a) HPLC-ESI-MS/MS total ion chromatogram for precursor  $m/z = 438.50$  from the gamma radiolysis of 100 mM HONTA in *n*-dodecane contacted with a 0.1 M  $\text{HNO}_3$  aqueous phase as a function of retention time and absorbed gamma dose ( $\sim 2.03 \text{ kGy h}^{-1}$ ). (b) MS/MS spectrum obtained with 35 eV collision energy.

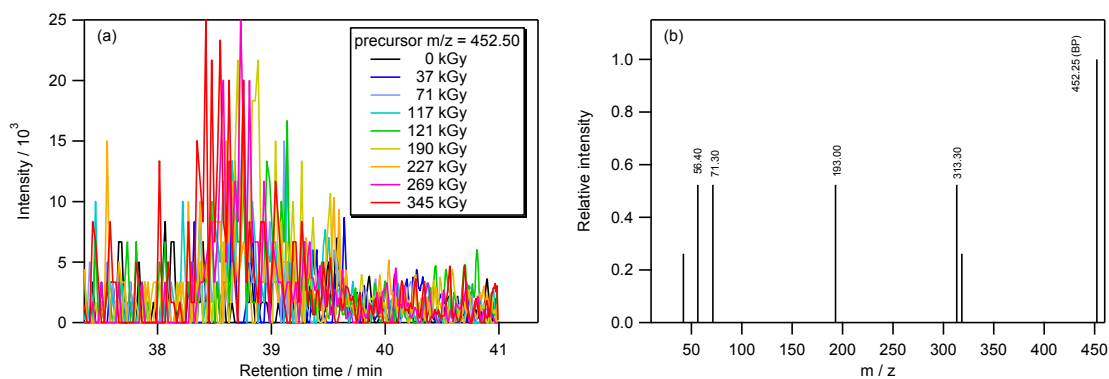

**Fig. S17.** (a) HPLC-ESI-MS/MS total ion chromatogram for precursor  $m/z = 452.50$  from the gamma radiolysis of 100 mM HONTA in *n*-dodecane contacted with a 0.1 M  $\text{HNO}_3$  aqueous phase as a function of retention time and absorbed gamma dose ( $\sim 2.03 \text{ kGy h}^{-1}$ ). (b) MS/MS spectrum obtained with 35 eV collision energy.

Supplementary Information

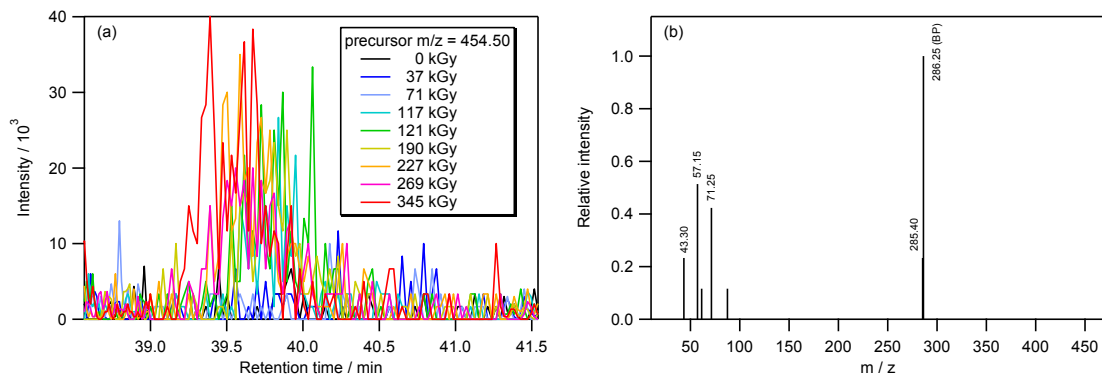

**Fig. S18.** (a) HPLC-ESI-MS/MS total ion chromatogram for precursor  $m/z = 454.50$  from the gamma radiolysis of 100 mM HONTA in *n*-dodecane contacted with a 0.1 M  $\text{HNO}_3$  aqueous phase as a function of retention time and absorbed gamma dose ( $\sim 2.03 \text{ kGy h}^{-1}$ ). (b) MS/MS spectrum obtained with 35 eV collision energy.

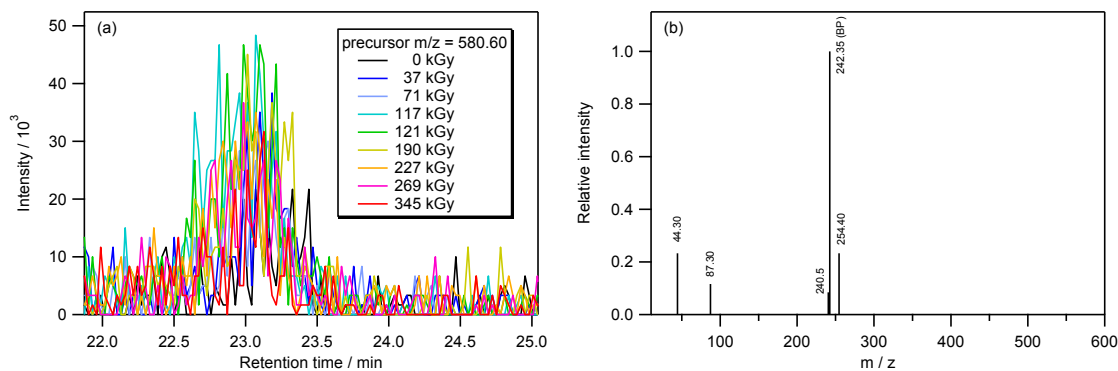

**Fig. S19.** (a) HPLC-ESI-MS/MS total ion chromatogram for precursor  $m/z = 580.60$  from the gamma radiolysis of 100 mM HONTA in *n*-dodecane contacted with a 0.1 M  $\text{HNO}_3$  aqueous phase as a function of retention time and absorbed gamma dose ( $\sim 2.03 \text{ kGy h}^{-1}$ ). (b) MS/MS spectrum obtained with 40 eV collision energy.

Supplementary Information

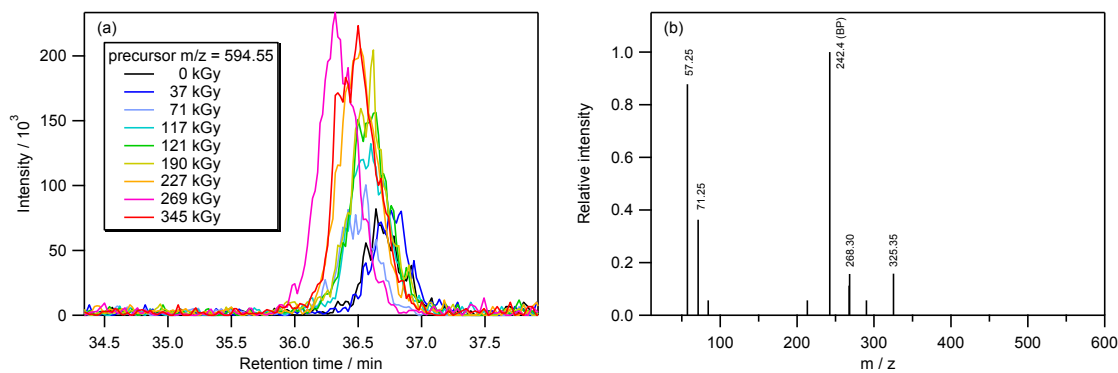

**Fig. S20.** (a) HPLC-ESI-MS/MS total ion chromatogram for precursor  $m/z = 594.55$  from the gamma radiolysis of 100 mM HONTA in *n*-dodecane contacted with a 0.1 M  $\text{HNO}_3$  aqueous phase as a function of retention time and absorbed gamma dose ( $\sim 2.03 \text{ kGy h}^{-1}$ ). (b) MS/MS spectrum obtained with 35 eV collision energy.

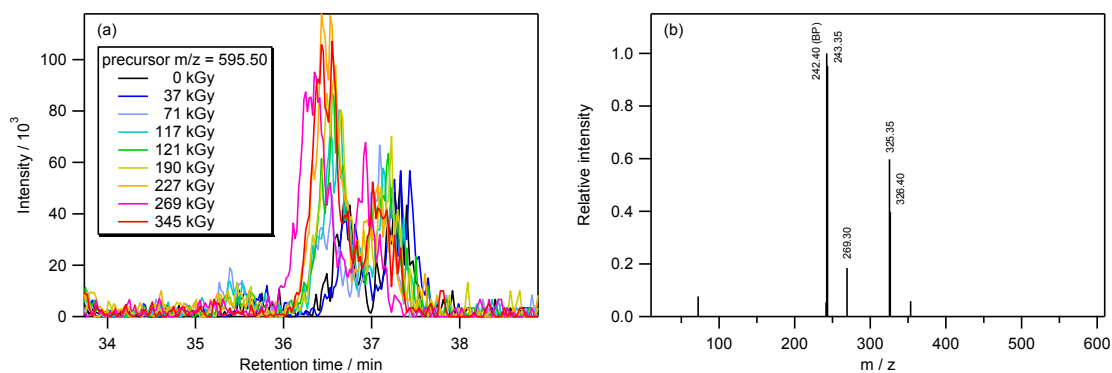

**Fig. S21.** (a) HPLC-ESI-MS/MS total ion chromatogram for precursor  $m/z = 595.50$  from the gamma radiolysis of 100 mM HONTA in *n*-dodecane contacted with a 0.1 M  $\text{HNO}_3$  aqueous phase as a function of retention time and absorbed gamma dose ( $\sim 2.03 \text{ kGy h}^{-1}$ ). (b) MS/MS spectrum obtained with 30 eV collision energy.

Supplementary Information

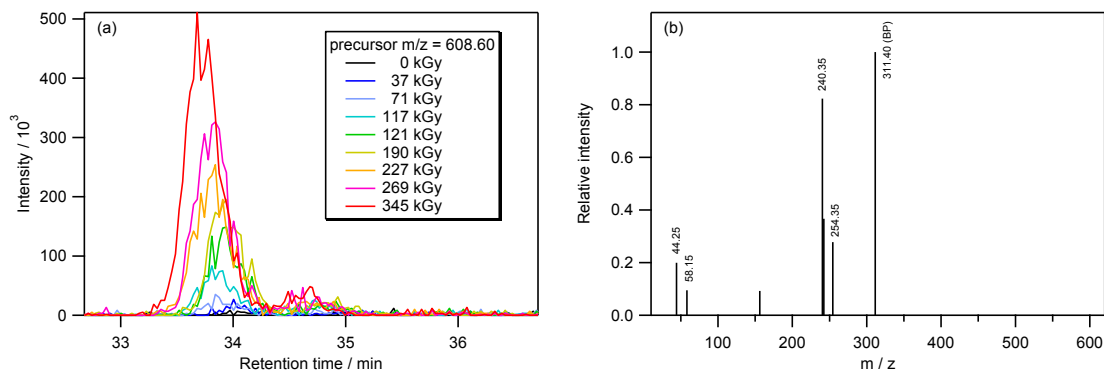

**Fig. S22.** (a) HPLC-ESI-MS/MS total ion chromatogram for precursor  $m/z = 608.60$  from the gamma radiolysis of 100 mM HONTA in *n*-dodecane contacted with a 0.1 M  $\text{HNO}_3$  aqueous phase as a function of retention time and absorbed gamma dose ( $\sim 2.03 \text{ kGy h}^{-1}$ ). (b) MS/MS spectrum obtained with 40 eV collision energy.

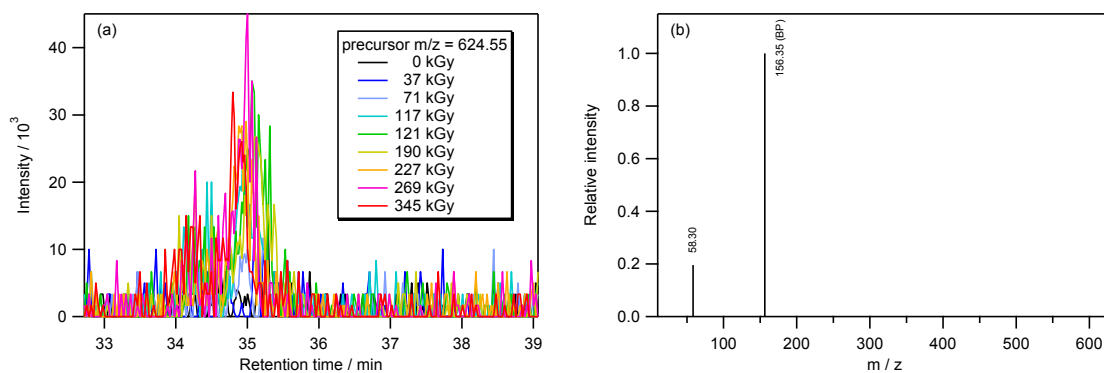

**Fig. S23.** (a) HPLC-ESI-MS/MS total ion chromatogram for precursor  $m/z = 624.55$  from the gamma radiolysis of 100 mM HONTA in *n*-dodecane contacted with a 0.1 M  $\text{HNO}_3$  aqueous phase as a function of retention time and absorbed gamma dose ( $\sim 2.03 \text{ kGy h}^{-1}$ ). (b) MS/MS spectrum obtained with 35 eV collision energy.

Supplementary Information

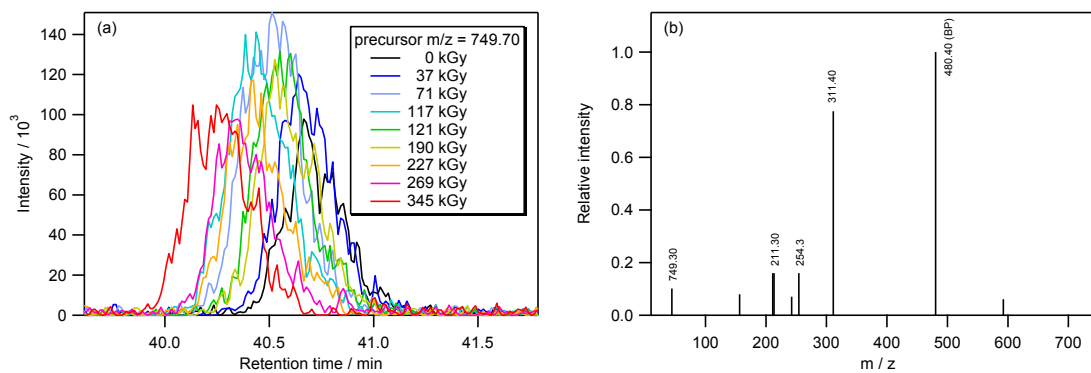

**Fig. S24.** (a) HPLC-ESI-MS/MS total ion chromatogram for precursor  $m/z = 749.70$  from the gamma radiolysis of 100 mM HONTA in *n*-dodecane contacted with a 0.1 M  $\text{HNO}_3$  aqueous phase as a function of retention time and absorbed gamma dose ( $\sim 2.03 \text{ kGy h}^{-1}$ ). (b) MS/MS spectrum obtained with 30 eV collision energy.

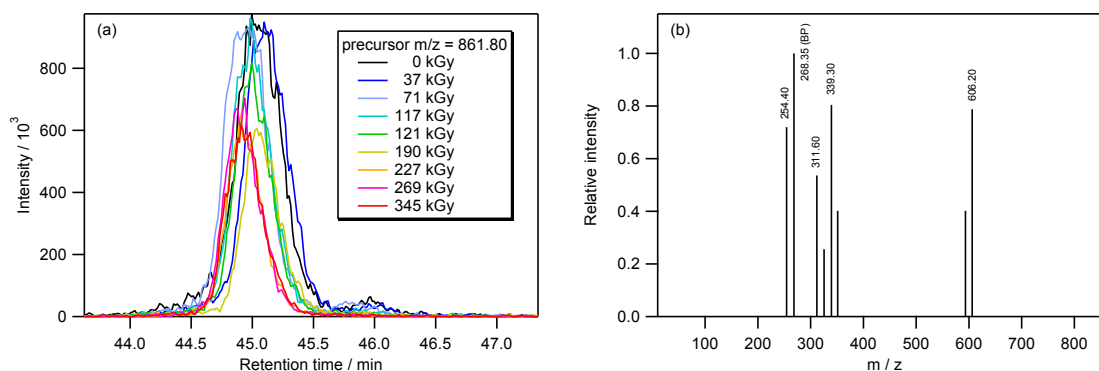

**Figure S25.** (a) HPLC-ESI-MS/MS total ion chromatogram for precursor  $m/z = 861.80$  from the gamma radiolysis of 100 mM HONTA in *n*-dodecane contacted with a 0.1 M  $\text{HNO}_3$  aqueous phase as a function of retention time and absorbed gamma dose ( $\sim 2.03 \text{ kGy h}^{-1}$ ). (b) MS/MS spectrum obtained with 30 eV collision energy. This product was assigned as hexa-*n*-octylnitrilotriacetamide (HONTA, MW = 861.5) from the retention time and the MS/MS spectrum by using standard solutions.
